# Supplementary material for: MRI radiomics enhances radiologists’ ability for characterizing intestinal fibrosis in patients with Crohn’s disease
Source: Springer Nature journal article supplement (doi:10.1186/s13244-024-01740-6), 2024-06-28
Supplement: MOESM1 [file 13244_2024_1740_MOESM1_ESM.pdf]

---

## **MRI Radiomics Enhances Radiologists' Ability for Characterizing Intestinal Fibrosis in Patients with Crohn's Disease**

### **ELECTRONIC SUPPLEMENTARY MATERIAL**

#### **Region-by-region location between MR enterography and surgical specimens and histopathological sections**

Region-by-region matching radiological and surgical analyses of each surgical specimen were performed by a radiologist (C.S.) with more than 20 years of experience in abdominal MR enterography (MRE) and a surgeon (Z.C.) with 11 years of experience in intestinal resection for Crohn's disease (CD) in the operating room. A bowel segment was obtained from each patient. For matched analysis between MRE and surgical specimens, each lesion was located according to its features (e.g., location, length, stricture, and fistula) or adjacent anatomic landmarks (e.g., ileocecal valve, appendix) <sup>1-2</sup>. The resected bowel lesions were examined histopathologically by a specialist gastrointestinal pathologist (Z.Y.) with 12 years of experience (Supplementary Tables 1-2).

---

## MR enterography protocol

The bowel was prepared as described previously<sup>2</sup>. Briefly, a polyethylene glycol electrolyte solution was ingested 6–8 h before MRE, followed by an oral contrast agent (1600–2000 mL of 2.5% mannitol solution) 1 h before MRE. Raceanisodamine hydrochloride (20 mg, Minsheng Pharmaceutical Group Co.) was injected intramuscularly into the buttocks 10 min before MRE.

MRE was performed on two 3-T MR system (Magnetom Trio or Prisma; Siemens Healthineers) equipped with 12- (Trio) or 18-channel phased-array body coils (Prisma), including (1) T2-weighted imaging; (2) diffusion-weighted magnetic resonance imaging (DWI, b values of 50, 400, 800 s/mm<sup>2</sup>; the apparent diffusion coefficient map was reconstructed from the original DWI data); (3) Magnetisation transfer magnetic resonance imaging (MTI) and (4) T1-weighted imaging before and at 30s, 60s, 90s, 2 min, 3.5 min, and 7 min after an intravenous injection of 0.2 mL/kg gadopentetate dimeglumine (Gd-DTPA) (Beilu Pharmaceuticals, Beijing, China) at a rate of 2 mL/s (Trio) or 0.1 mL/kg gadobutrol (Bayer AG, Leverkusen, Germany) at a rate of 1.5 mL/s (Prisma).

---

## Development and validation of MRE-based RMs

### *Features selection and RM development*

To avoid overfitting and to select the best parameters for the diagnostic model, we conducted 10-fold cross-validation in the training cohort. In the training procedure of this 10-fold cross-validation, a grid search method was used to determine the optimal parameters made of kernel type (type of kernel function), C (inverse of regularisation strength), gamma (bandwidth of kernel function, radius of hypercircle), and max\_iter (maximum number of iterations required for the solvers to converge) in the SVM classifier. The overall prediction performance in the training cohort was assessed based on all probabilities of the testing samples in each fold during cross-validation. Model development was performed in Python (version 3.6; <https://www.python.org/>) using the Scikit-learn package (version 0.22; <https://www.scikit-learn.org/>).

---

## **RMs performance**

### ***Radiomic features selection & observer reproducibility***

A total of 1130 radiomic features were extracted from each MRE sequence, and 400 features with a variance close to zero were eliminated. For the remaining 730 features, the median intraclass correlation coefficients (ICCs) for inter- and intra-observer agreement assessments were 0.972 (quartile range, 0.957–0.998) and 0.966 (quartile range, 0.961–0.985) respectively, justifying the reliability of the radiomic features.

**Supplementary Table 1. Histologic scores for intestinal fibrosis and inflammation**

| Score           | Fibrosis                                                          | Inflammation                                               |
|-----------------|-------------------------------------------------------------------|------------------------------------------------------------|
| None-mild       |                                                                   |                                                            |
| 0               | No fibrosis                                                       | No inflammation or distortion                              |
| 1               | Minimal fibrosis in submucosa or subserosa                        | Lamina propria inflammation only                           |
| 2               | Increased submucosal fibrosis, septa into muscularis propria      | Submucosal foci of inflammation                            |
| Moderate-severe |                                                                   |                                                            |
| 3               | Septa through muscularis propria, increase in subserosal collagen | Foci of transmural inflammation                            |
| 4               | Significant transmural scar, marked subserosal collagen           | Significant, dissecting, confluent transmural inflammation |

**Supplementary Table 2. Histological fibrosis and inflammation scores in the training and test cohorts**

|                                  | Training cohort | Test cohort | <i>P</i> † |
|----------------------------------|-----------------|-------------|------------|
| Bowel segments, n                | 93              | 30          | --         |
| Fibrosis score, median [IQR]     | 3 (2–3)         | 3 (2–4)     | <0.001     |
| 1                                | 2               | 1           | --         |
| 2                                | 12              | 4           | --         |
| 3                                | 44              | 16          | --         |
| 4                                | 35              | 9           | --         |
| Inflammation score, median [IQR] | 3 (3–4)         | 3 (2–3)     | <0.001     |
| 1                                | 1               | 0           | --         |
| 2                                | 8               | 8           | --         |
| 3                                | 31              | 9           | --         |
| 4                                | 53              | 13          | --         |

IQR, interquartile range † Comparison between the training and test cohorts.

**Supplementary Table 3. Visual interpretation of intestinal fibrosis on MRE in the training and test cohorts**

| MRE features                                               | Training cohort<br>(n=93) | Test cohort<br>(n=30) | <i>P</i> † |
|------------------------------------------------------------|---------------------------|-----------------------|------------|
| T2WI iso- to hypo-intensity<br>compared to adjacent muscle |                           |                       | <0.001     |
| 0                                                          | 60                        | 18                    |            |
| 1                                                          | 33                        | 12                    |            |
| Transmural enhancement                                     |                           |                       | <0.001     |
| 0                                                          | 63                        | 22                    |            |
| 1                                                          | 30                        | 8                     |            |
| Widening of Mesenteric fat                                 |                           |                       | <0.001     |
| 0                                                          | 40                        | 14                    |            |
| 1                                                          | 53                        | 16                    |            |
| DWI                                                        |                           |                       | <0.001     |
| 0                                                          | 5                         | 4                     |            |
| 1                                                          | 88                        | 26                    |            |
| ADC (mean ± SD, 10 <sup>-3</sup> mm <sup>2</sup> /s)       | 1216 ± 327                | 1001 ± 572            | <0.001     |
| MTR (mean ± SD)                                            | 34 ± 15                   | 36 ± 13               | <0.001     |
| Normalized MTR (mean ± SD)                                 | 0.69 ± 0.30               | 0.71 ± 0.26           | <0.001     |

Note. —The observation result of each MRE feature was recorded as a score, of which

‘0’ refers to absence and ‘1’ to presence. MRE, magnetic resonance imaging. DWI, Insights Imaging (2024) Zhang M, Zeng Y, Fang Z, et al.

---

diffusion-weighted MRI; ADC, apparent diffusion coefficients; MTR, magnetization transfer ratio † Comparison between the training and total test cohort



**Supplementary Table 4. Diagnostic performances of the radiomic models dependent on inflammation severity in the training and test cohorts**

| Model                                | Accuracy  | Sensitivity | Specificity | AUC              | DeLong                            |
|--------------------------------------|-----------|-------------|-------------|------------------|-----------------------------------|
|                                      | (%)       | (%)         | (%)         | (95% CI)         | test <sup>†</sup><br>( <i>P</i> ) |
| Training cohort (n= 93) <sup>†</sup> |           |             |             |                  |                                   |
| Inflammatory severity                |           |             |             |                  |                                   |
| None–mild (n= 9)                     |           |             |             |                  |                                   |
| RM1                                  | 78 (7/9)  | 60 (3/5)    | 100 (4/4)   | 0.80 (0.75–0.86) | 0.56                              |
| RM2                                  | 89 (8/9)  | 80 (4/5)    | 100 (4/4)   | 0.90 (0.86–0.95) | 0.42                              |
| RM3                                  | 100 (9/9) | 100 (5/5)   | 100 (4/4)   | 1.00 (1.00–1.00) | 0.67                              |
| Moderate–severe (n= 84)              |           |             |             |                  |                                   |
| RM1                                  | 81(68/84) | 78 (58/74)  | 100 (10/10) | 0.86 (0.80–0.91) | --                                |
| RM2                                  | 82(69/84) | 80 (59/74)  | 100 (10/10) | 0.86 (0.81–0.91) | --                                |
| RM3                                  | 88(74/84) | 87 (64/74)  | 100 (10/10) | 0.93 (0.88–0.98) | --                                |
| Test cohort (n=30) <sup>†</sup>      |           |             |             |                  |                                   |
| None–mild (n= 8)                     |           |             |             |                  |                                   |
| RM1                                  | 88(7/8)   | 83 (5/6)    | 100 (2/2)   | 0.92 (0.89–0.95) | 0.84                              |
| RM2                                  | 75(6/8)   | 67 (4/6)    | 100 (2/2)   | 0.83 (0.80–0.91) | 0.64                              |
| RM3                                  | 100(8/8)  | 100 (6/6)   | 100 (2/2)   | 1.00 (1.00–1.00) | 0.55                              |
| Moderate–severe (n= 22)              |           |             |             |                  |                                   |

---

|     |           |            |            |                  |    |
|-----|-----------|------------|------------|------------------|----|
| RM1 | 73(16/22) | 68 (13/19) | 3/3(1.000) | 0.84 (0.79–0.90) | -- |
| RM2 | 77(17/22) | 74 (14/19) | 3/3(1.000) | 0.87 (0.81–0.95) | -- |
| RM3 | 82(18/22) | 79(15/19)  | 3/3(1.000) | 0.90 (0.83–0.98) | -- |

---

Note. —Data in parentheses are numerators and denominators. RMs were based on different MR sequence combinations: RM1 (T2WI and enhanced-T1WI), RM2 (T2WI, enhanced-T1WI, and diffusion-weighted imaging [DWI], apparent diffusion coefficient [ADC]), and RM3 (T2WI, enhanced-T1WI, DWI, ADC, and magnetisation transfer MRI)

RM, Radiomic Model; CI, confidence interval; AUC, area under the receiver operating characteristic curve

†Number of resected bowel segments. ‡Comparison of AUC for diagnosing fibrosis between the none-mild and moderate-to-severe inflammatory bowel segments.

**Supplementary Table 5. Diagnostic performance of the radiomic models dependent on location of Crohn's disease in the training and test cohorts**

| Model                                | Accuracy   | Sensitivity | Specificity | AUC              | DeLong                            |
|--------------------------------------|------------|-------------|-------------|------------------|-----------------------------------|
|                                      | (%)        | (%)         | (%)         | (95% CI)         | test <sup>†</sup><br>( <i>P</i> ) |
| Training cohort (n= 93) <sup>†</sup> |            |             |             |                  |                                   |
| Lesion locations                     |            |             |             |                  |                                   |
| Small bowel strictures (n= 50)       |            |             |             |                  |                                   |
| RM1                                  | 82 (41/50) | 80 (36/45)  | 100 (5/5)   | 0.86 (0.76–0.94) | 0.32                              |
| RM2                                  | 80 (40/50) | 78 (35/45)  | 100 (5/5)   | 0.82 (0.71–0.93) | 0.62                              |
| RM3                                  | 88 (44/50) | 87 (39/45)  | 100 (5/5)   | 0.90 (0.81–0.98) | 0.74                              |
| Colonic strictures (n= 43)           |            |             |             |                  |                                   |
| RM1                                  | 91 (39/43) | 88 (30/34)  | 100 (9/9)   | 0.95 (0.85–1.00) | --                                |
| RM2                                  | 88 (37/43) | 82 (28/34)  | 100 (9/9)   | 0.93 (0.80–0.98) | --                                |
| RM3                                  | 88 (38/43) | 83 (29/34)  | 100 (9/9)   | 0.90 (0.82–0.96) | --                                |
| Test cohort (n=30) <sup>†</sup>      |            |             |             |                  |                                   |
| Small bowel strictures (n= 21)       |            |             |             |                  |                                   |
| RM1                                  | 71 (15/21) | 65 (11/17)  | 100 (4/4)   | 0.82 (0.66–0.89) | 0.75                              |
| RM2                                  | 76 (16/21) | 71 (12/17)  | 100 (4/4)   | 0.85 (0.78–0.93) | 0.54                              |
| RM3                                  | 81 (17/21) | 76 (13/17)  | 100 (4/4)   | 0.88 (0.87–0.91) | 0.63                              |
| Colonic strictures (n= 9)            |            |             |             |                  |                                   |

|     |          |          |           |                  |    |
|-----|----------|----------|-----------|------------------|----|
| RM1 | 67 (6/9) | 63 (5/8) | 100 (1/1) | 0.81 (0.78–0.86) | -- |
| RM2 | 78 (7/9) | 75 (6/8) | 100 (1/1) | 0.88 (0.81–0.95) | -- |
| RM3 | 89 (8/9) | 88 (7/8) | 100 (1/1) | 0.94 (0.88–0.98) | -- |

Note. —Data in parentheses are numerators and denominators. RMs were based on different MR sequence combinations: RM1 (T2WI and enhanced-T1WI), RM2 (T2WI, enhanced-T1WI, and diffusion-weighted imaging [DWI], apparent diffusion coefficient [ADC]), and RM3 (T2WI, enhanced-T1WI, DWI, ADC, and magnetisation transfer MRI)

RM, Radiomic Model; CI, confidence interval; AUC, area under the receiver operating characteristic curve

†Number of resected bowel segments. ‡Comparison of AUC for diagnosing fibrosis between the small bowel and colonic strictures.

**Supplementary Table 6. Diagnostic performance of the radiomic models in different magnetic resonance scanners in the training and test cohorts**

| Model                       | Accuracy   | Sensitivity | Specificity | AUC              | DeLong       |
|-----------------------------|------------|-------------|-------------|------------------|--------------|
|                             | (%)        | (%)         | (%)         | (95% CI)         | test†<br>(P) |
| Training cohort (n= 93) †   |            |             |             |                  |              |
| Magnetic resonance scanners |            |             |             |                  |              |
| MR1 (n= 37)                 |            |             |             |                  |              |
| RM1                         | 78 (29/37) | 70 (19/27)  | 100 (10/10) | 0.85 (0.81–0.90) | 0.65         |
| RM2                         | 87 (32/37) | 81 (22/27)  | 100 (10/10) | 0.93 (0.87–0.97) | 0.21         |
| RM3                         | 76 (28/37) | 67 (18/27)  | 100 (10/10) | 0.84 (0.79–0.91) | 0.56         |
| MR2 (n= 56)                 |            |             |             |                  |              |
| RM1                         | 77 (43/56) | 75 (39/52)  | 100 (4/4)   | 0.87 (0.82–0.93) | --           |
| RM2                         | 75 (42/56) | 73 (38/52)  | 100 (4/4)   | 0.85 (0.80–0.90) | --           |
| RM3                         | 95 (53/56) | 94 (49/52)  | 100 (4/4)   | 0.97 (0.88–1.00) | --           |
| Test cohort (n=30) †        |            |             |             |                  |              |
| MR1 (n= 25)                 |            |             |             |                  |              |
| RM1                         | 76 (19/25) | 75 (18/24)  | 100 (1/1)   | 0.88 (0.83–0.87) | 0.81         |
| RM2                         | 80 (20/25) | 79 (19/24)  | 100 (1/1)   | 0.90 (0.77–0.91) | 0.10         |
| RM3                         | 72 (18/25) | 71 (17/24)  | 100 (1/1)   | 0.85 (0.79–0.90) | 0.22         |
| MR2 (n= 5)                  |            |             |             |                  |              |

|     |           |           |           |                  |    |
|-----|-----------|-----------|-----------|------------------|----|
| RM1 | 60 (3/5)  | 100 (1/1) | 50 (2/4)  | 0.75 (0.68–0.78) | -- |
| RM2 | 80 (4/5)  | 100 (1/1) | 75 (3/4)  | 0.88 (0.86–0.89) | -- |
| RM3 | 100 (5/5) | 100 (1/1) | 100 (4/4) | 1.00 (1.00–1.00) | -- |

Note. —Data in parentheses are numerators and denominators. RMs were based on different MR sequence combinations: RM1 (T2WI and enhanced-T1WI), RM2 (T2WI, enhanced-T1WI, and diffusion-weighted imaging [DWI], apparent diffusion coefficient [ADC]), and RM3 (T2WI, enhanced-T1WI, DWI, ADC, and magnetisation transfer MRI)

MR1, Magnetom Trio; MR2, Magnetom Prisma; RM, Radiomic Model; CI, confidence interval; AUC, area under the receiver operating characteristic curve

†Number of resected bowel segments. ‡Comparison of AUC for diagnosing fibrosis between MR1 and MR2.

**Supplementary Table 7. Diagnostic performance of the radiomic models in bowel strictures with and without penetrating diseases in the training and test cohorts**

| Model                                | Accuracy (%) | Sensitivity (%) | Specificity (%) | AUC (95% CI)     | DeLong test <sup>†</sup> (P) |
|--------------------------------------|--------------|-----------------|-----------------|------------------|------------------------------|
| Training cohort (n= 93) <sup>†</sup> |              |                 |                 |                  |                              |
| Penetrating diseases                 |              |                 |                 |                  |                              |
| Without penetrating diseases (n= 58) |              |                 |                 |                  |                              |
| RM1                                  | 78 (45/58)   | 74 (37/50)      | 100 (8/8)       | 0.85 (0.81–0.91) | 0.24                         |
| RM2                                  | 74 (43/58)   | 70 (35/50)      | 100 (8/8)       | 0.81 (0.77–0.86) | 0.59                         |
| RM3                                  | 88 (51/58)   | 86 (43/50)      | 100 (8/8)       | 0.93 (0.87–0.97) | 0.36                         |
| With penetrating diseases (n= 35)    |              |                 |                 |                  |                              |
| RM1                                  | 86 (30/35)   | 83 (24/29)      | 100 (6/6)       | 0.91 (0.87–0.97) | --                           |
| RM2                                  | 83 (29/35)   | 79 (23/29)      | 100 (6/6)       | 0.90 (0.87–0.96) | --                           |
| RM3                                  | 80 (28/35)   | 76 (22/29)      | 100 (6/6)       | 0.88 (0.82–0.93) | --                           |
| Test cohort (n=30) <sup>†</sup>      |              |                 |                 |                  |                              |
| Without penetrating diseases (n= 16) |              |                 |                 |                  |                              |
| RM1                                  | 69 (11/16)   | 58 (7/12)       | 100 (4/4)       | 0.79 (0.72–0.89) | 0.43                         |
| RM2                                  | 75 (12/16)   | 67 (8/12)       | 100 (4/4)       | 0.83 (0.79–0.90) | 0.15                         |
| RM3                                  | 88 (14/16)   | 83 (10/12)      | 100 (4/4)       | 0.92 (0.88–0.98) | 0.70                         |
| With penetrating diseases (n= 14)    |              |                 |                 |                  |                              |

|     |            |            |           |                  |    |
|-----|------------|------------|-----------|------------------|----|
| RM1 | 86 (12/14) | 85 (11/13) | 100 (1/1) | 0.92 (0.88–0.98) | -- |
| RM2 | 79 (11/14) | 77 (10/13) | 100 (1/1) | 0.89 (0.85–0.96) | -- |
| RM3 | 71 (10/14) | 69 (9/13)  | 100 (1/1) | 0.85 (0.83–0.93) | -- |

Note. —Data in parentheses are numerators and denominators. RMs were based on different MR sequence combinations: RM1 (T2WI and enhanced-T1WI), RM2 (T2WI, enhanced-T1WI, and diffusion-weighted imaging [DWI], apparent diffusion coefficient [ADC]), and RM3 (T2WI, enhanced-T1WI, DWI, ADC, and magnetisation transfer MRI)

RM, Radiomic Model; CI, confidence interval; AUC, area under the receiver operating characteristic curve

†Number of resected bowel segments. ‡Comparison of AUC for diagnosing fibrosis between patients with and without penetrating disease.



---

## References

1. Wagner M, Ko HM, Chatterji M, et al. Magnetic resonance imaging predicts histopathological composition of ileal Crohn's Disease. *J Crohns Colitis* 2018;12:718-729.
2. Li XH, Mao R, Huang SY et al. Characterization of Degree of Intestinal Fibrosis in Patients with Crohn Disease by Using Magnetization Transfer MR Imaging. *Radiology* 2018;287(2):494-503.
